# Supplementary material for: In Vitro Anti-Leishmanial Effect of Metallic Meso-Substituted Porphyrin Derivatives against Leishmania braziliensis and Leishmania panamensis Promastigotes Properties
Source: Molecules. 2020 Apr 19;25(8):1887. doi: 10.3390/molecules25081887 (PMC7221524; doi:10.3390/molecules25081887)
Supplement: Supplementary file 1 [file molecules-25-01887-s001.pdf]

## Supplementary material

### *In vitro anti-leishmanial effect of metallic meso-substituted porphyrin derivatives against Leishmania braziliensis and Leishmania panamensis promastigotes properties*

#### *Synthesis*

*5,10,15,20-tetrakis(4-ethylphenyl)porphyrin-Zn(II) (2)*: A mixture of **(1)** (0.2755 mmol) and  $\text{ZnCl}_2$  (1.4673 mmol) in DMF (20 mL) was stirring by 4 hours at room temperature. The reaction mixture was cooled in ice-water bath; the formed precipitate was filtered and dried at ambient temperature; **(2)** was purified through column chromatography with silica gel (2.5 x 24 cm), petroleum ether:ethyl acetate (PE:EA) was using as mobile phase 3:1 (rf = 0.87). Yield: 0.150 g, 75 %; melting point > 300 °C; UV-Vis (ethyl acetate)  $\lambda$  (nm): 422, 556, 597; FT-IR-ATR ( $\text{cm}^{-1}$ ):  $\text{C}_{\text{sp}^3}\text{-H}$  (2960.44),  $\text{C}=\text{C}$  (1650.32),  $\text{C}=\text{N}$  (992.39),  $\text{C}-\text{N}$  (851.54); Anal. Elem. Calc. for  $\text{C}_{52}\text{H}_{44}\text{N}_4\text{Zn}$  (%): C (79.05), H (5.61), N (7.10), Zn (8.27); Anal. Elem. Found  $\text{C}_{52}\text{H}_{44}\text{N}_4\text{Zn}$  (%): (79.02), H (5.60), N (7.09), Zn (8.28).

*5,10,15,20-tetrakis(4-ethylphenyl)porphyrin-Sn(IV) (3)*: A mixture of **(1)** (0.2755 mmol) and  $\text{SnCl}_2 \cdot 2\text{H}_2\text{O}$  (0.8865 mmol) in DMF (20 mL) was stirring by 6 hours at room temperature. The reaction mixture was cooled in ice-water bath; the formed precipitate was filtered and dried at ambient temperature; **(3)** was purified through column chromatography with silica gel, PE:EA was used as mobile phase 3:1 (rf = 0.80). Yield: 0.120 g, 60 %; melting point > 300 °C; UV-Vis (ethyl acetate)  $\lambda$  (nm): 415, 514, 549; FT-IR-ATR ( $\text{cm}^{-1}$ ):  $\text{C}_{\text{sp}^3}\text{-H}$  (2960.44),  $\text{C}=\text{C}$  (1470.55),  $\text{C}=\text{N}$  (956.25),  $\text{C}-\text{N}$  (846.32); Anal. Elem. Calc. for  $\text{C}_{52}\text{H}_{44}\text{N}_4\text{Cl}_2\text{Sn}$  (%): C (68.29), H (4.84), N (6.13), Cl(7.75), Sn (12.97).

*5,10,15,20-tetrakis(4-ethylphenyl)porphyrin-Mn(II) (4)*: A mixture of **(1)** (0.2755 mmol) and  $\text{MnCl}_2 \cdot 4\text{H}_2\text{O}$  (1.0105 mmol) in DMF (20 mL) was stirring by 6 hours at room temperature. The reaction mixture was cooled in ice-water bath; the formed precipitate was filtered and dried at ambient temperature; **(4)** was purified through column chromatography with silica gel, PE:EA was used as mobile phase 2:1 (rf = 0.89). Yield: 0.118 g, 59 %; melting point > 300 °C; UV-Vis (ethyl acetate)  $\lambda$  (nm): 416, 469, 549; FT-IR-ATR ( $\text{cm}^{-1}$ ):  $\text{C}_{\text{sp}^3}\text{-H}$  (2960.44),  $\text{C}=\text{C}$  (1181.04),  $\text{C}=\text{N}$  (964.71),  $\text{C}-\text{N}$

(846.18); Anal. Elem. Calc. for  $C_{52}H_{44}N_4Mn$  (%): C (80.11), H (5.65), N (7.19), Mn (7.05). Anal. Elem. Found. for  $C_{52}H_{44}N_4Mn$  (%): C (80.08), H (5.69), N (7.18), Mn (7.04).

*5,10,15,20-tetrakis(4-ethylphenyl)porphyrin-Ni(II)* (**5**): A mixture of (**1**) (0.2755 mmol) and  $NiCl_2 \cdot 6H_2O$  (0.8414 mmol) in DMF (20 mL) was stirring by 6 hours at room temperature. The reaction mixture was cooled in ice-water bath; the formed precipitate was filtered and dried at ambient temperature; (**5**) was purified through column chromatography with silica gel, PE:EA was used as mobile phase 3:1 (rf = 0.69). Yield: 0.121 g, 60.5 %; melting point > 300 °C; UV-Vis ethyl acetate  $\lambda$  (nm): 418, 592; FT-IR-ATR ( $cm^{-1}$ ):  $C_{sp^3}-H$  (2960.44),  $C=C$  (1454.55),  $C=N$  (1002.06),  $C-N$  (818.64); Anal. Elem. Calc. for  $C_{52}H_{44}N_4Ni$  (%): C (79.72), H (5.62), N (7.16), Ni (7.50). Anal. Elem. Found. for  $C_{52}H_{44}N_4Ni$ , (%): C (79.70), H (5.66), N (7.15), Ni (7.49).

*5,10,15,20-tetrakis(4-ethylphenyl)porphyrin-Al(III)* (**6**): A mixture of (**1**) (0.2755 mmol) and  $AlCl_3$  (1.4999 mmol) in DMF (30 mL) was stirring by 8 hours at room temperature. The reaction mixture was cooled in ice-water bath; the formed precipitate was filtered and dried at ambient temperature; (**6**) was purified through column chromatography with silica gel, PE:EA was used as mobile phase 3:1 (rf = 0.79). Yield: 0.141 g, 70.5 %; melting point > 300 °C; UV-Vis (ethyl acetate)  $\lambda$  (nm): 416, 513, 645; FT-IR-ATR ( $cm^{-1}$ ):  $C_{sp^3}-H$  (2967.96),  $C=C$  (1601.84),  $C=N$  (1183.38),  $C-N$  (826.31); Anal. Elem. Calc. for  $C_{52}H_{44}N_4AlCl$  (%): C (79.34), H (5.60), N (7.12), Al (3.43), Cl (5.51). Anal. Elem. Calc. for  $C_{52}H_{44}N_4AlCl$  (%): C (79.32), H (5.63), N (7.12), Al (3.43), Cl (5.50).

*5,10,15,20-tetrakis(4-ethylphenyl)porphyrin-V(III)* (**7**): A mixture (**1**) (0.2755 mmol) and  $VCl_3$  (1.2714 mmol) in DMF (30 mL) was stirring by 8 hours at 100 °C. The reaction mixture was cooled in ice-water bath; the formed precipitate was filtered and dried at ambient temperature; (**7**) was purified through column chromatography with silica gel, PE:EA was used as mobile phase 1:3 (rf = 0.79). Yield: 0.138 g, 69 %; melting point > 300 °C; UV-Vis (ethyl acetate)  $\lambda$  (nm): 415, 515, 550, 594; FT-IR-ATR ( $cm^{-1}$ ):  $C_{sp^3}-H$  (2959.83),  $C=C$  (1603.72),  $C=N$  (1184.93),  $C-N$  (824.22); Anal. Elem. Calc. for  $C_{52}H_{44}N_4VCl$  (%): C (77.0), H (5.43), N (6.91), V (6.29), Cl (4.37). Anal. Elem. Calc. for  $C_{52}H_{44}N_4VCl$  (%): C (76.98), H (5.47), N (6.90), V (6.28), Cl (4.37).

## Characterization

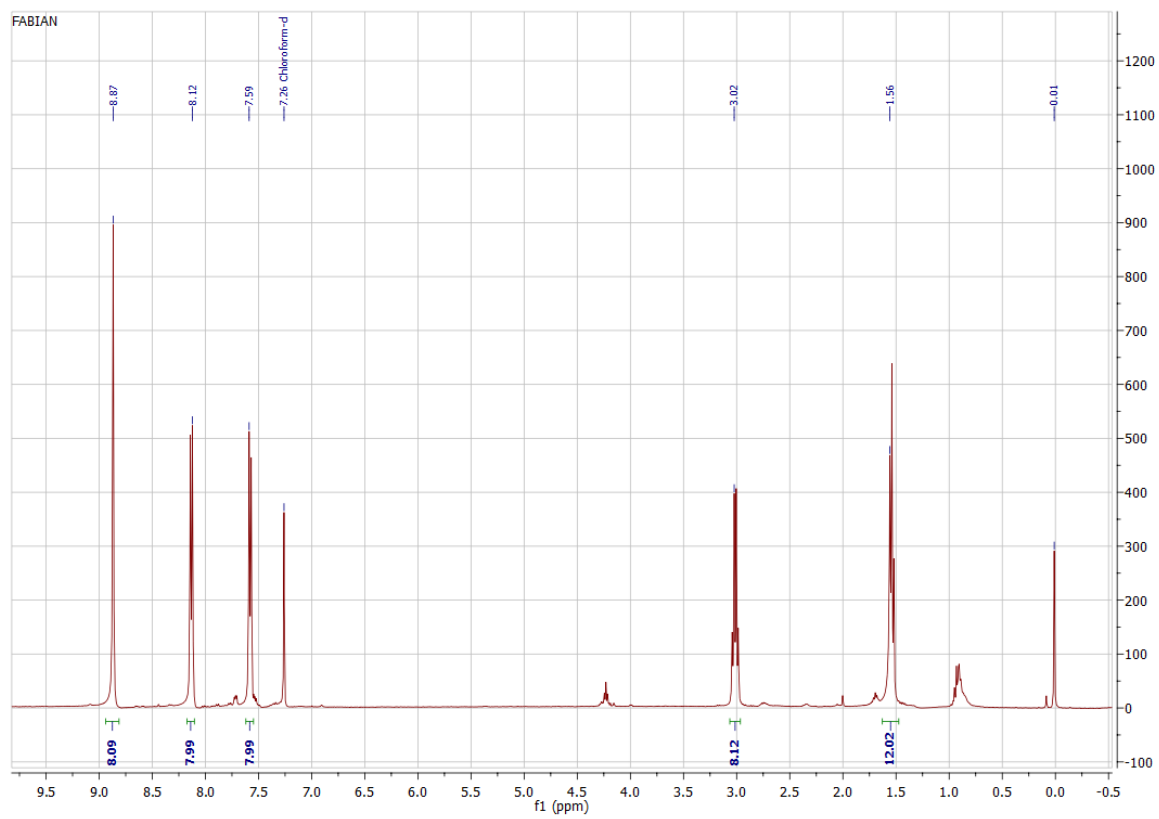

Figure S1.  $^1\text{H}$  RMN of (1, Ph).

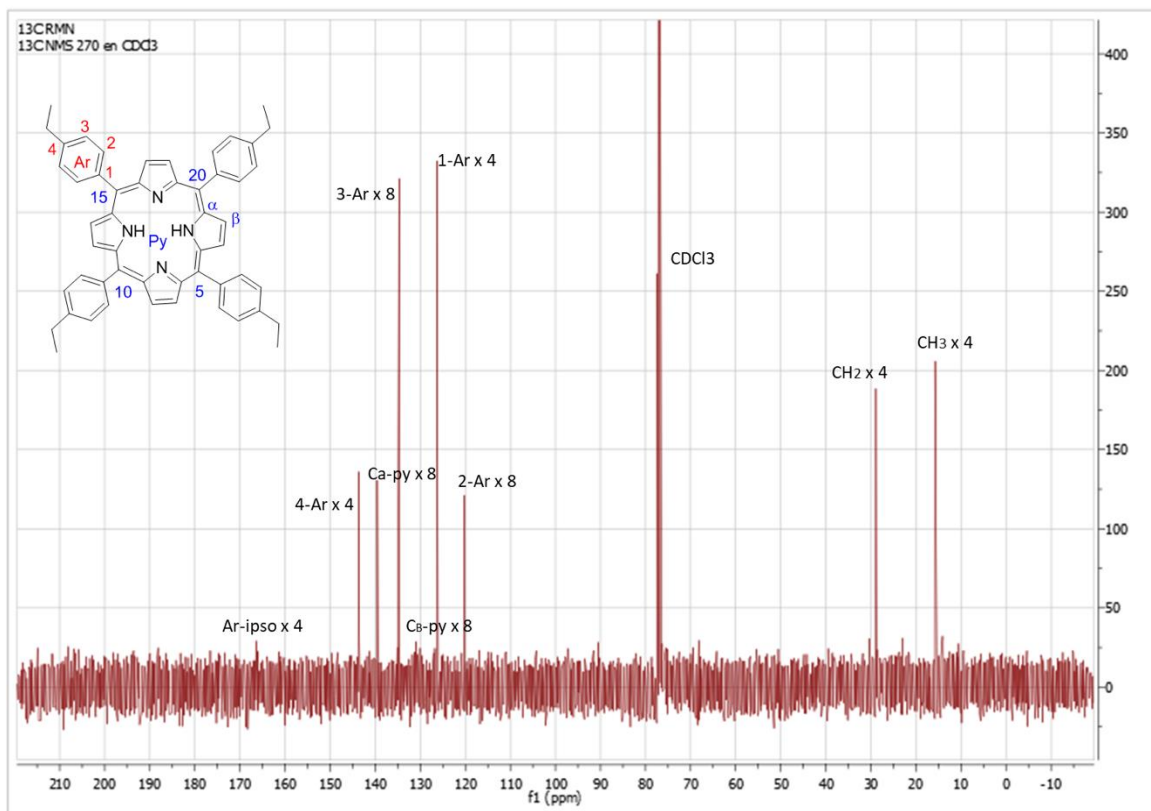

Figure S2. <sup>13</sup>C RMN of (1, Ph).

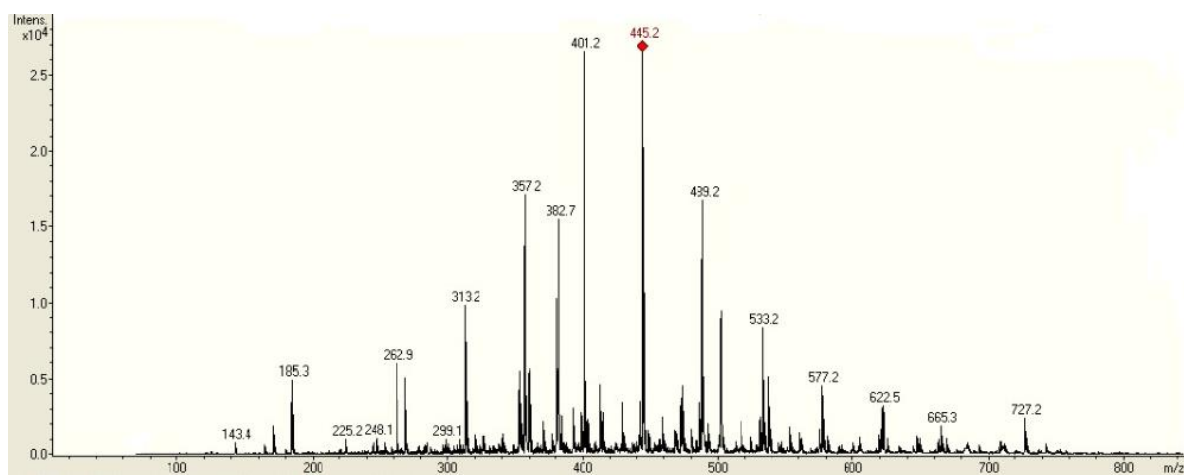

Figure S3. Electrospray ionization tandem mass spectrum of (1, Ph).

*FTIR spectra*

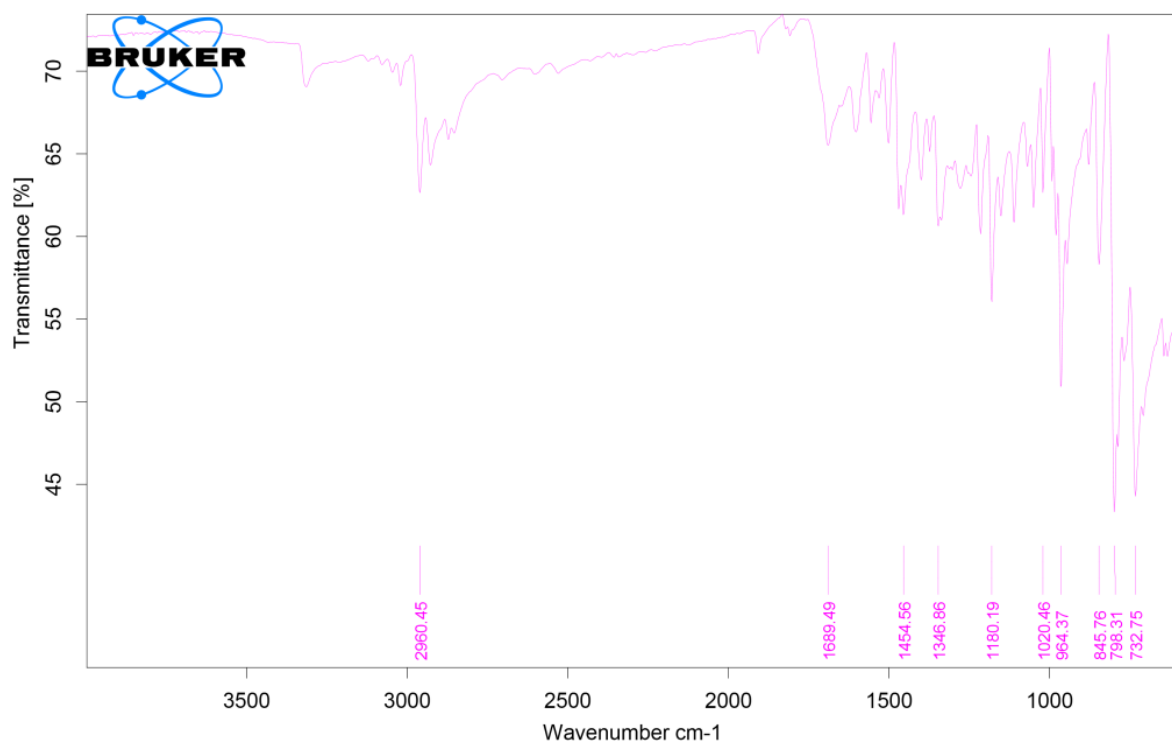

Figure S4. FTIR spectrum of (1, Ph).

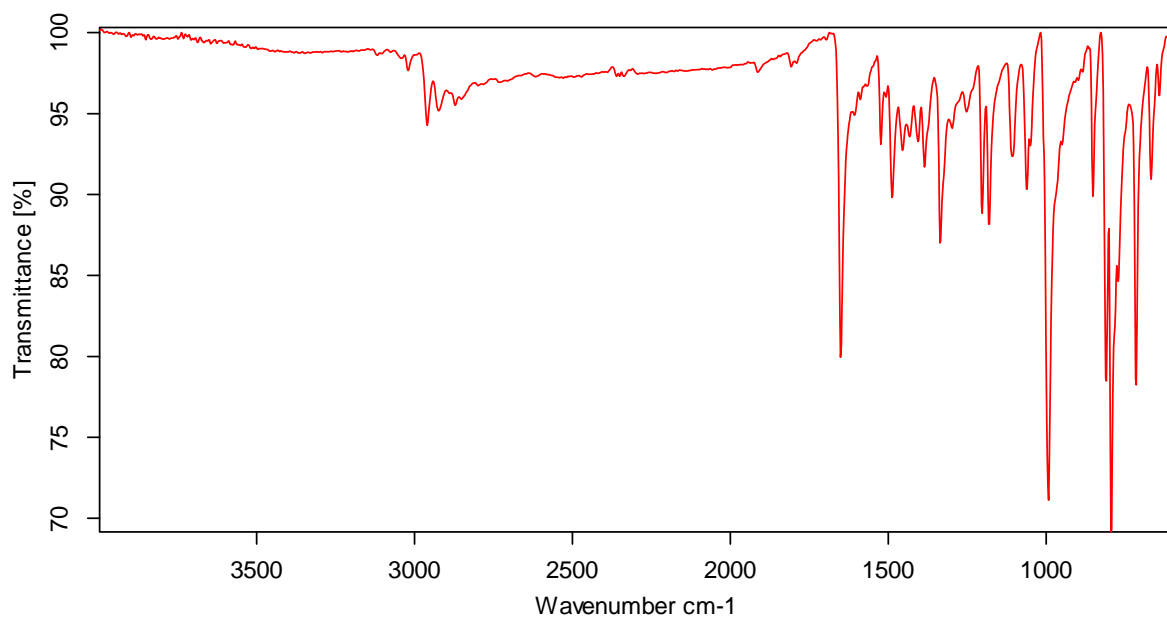

Figure S5. FTIR spectrum of (2, Ph-Zn).

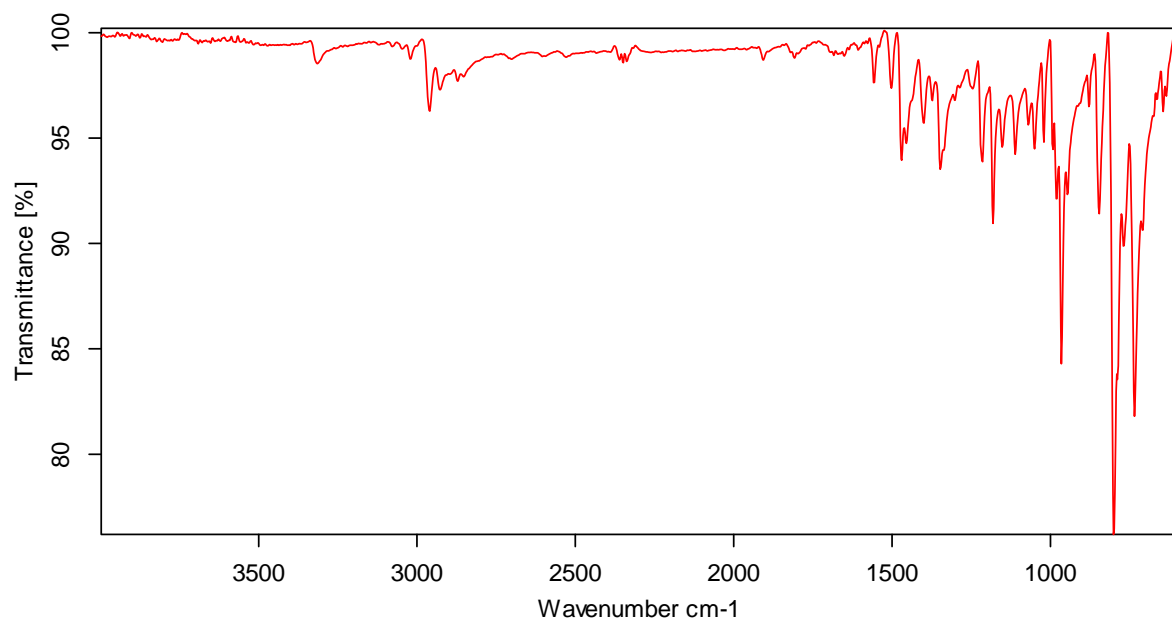

Figure S6. FTIR spectrum of (3, Ph-Sn).

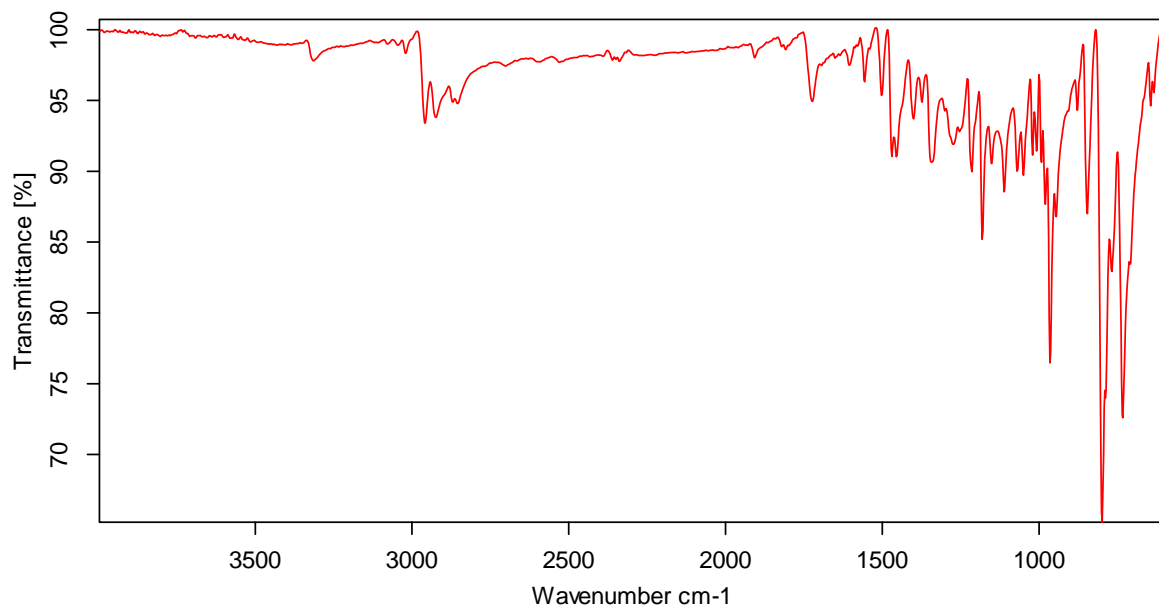

Figure S7. FTIR spectrum of (4, Ph-Mn).

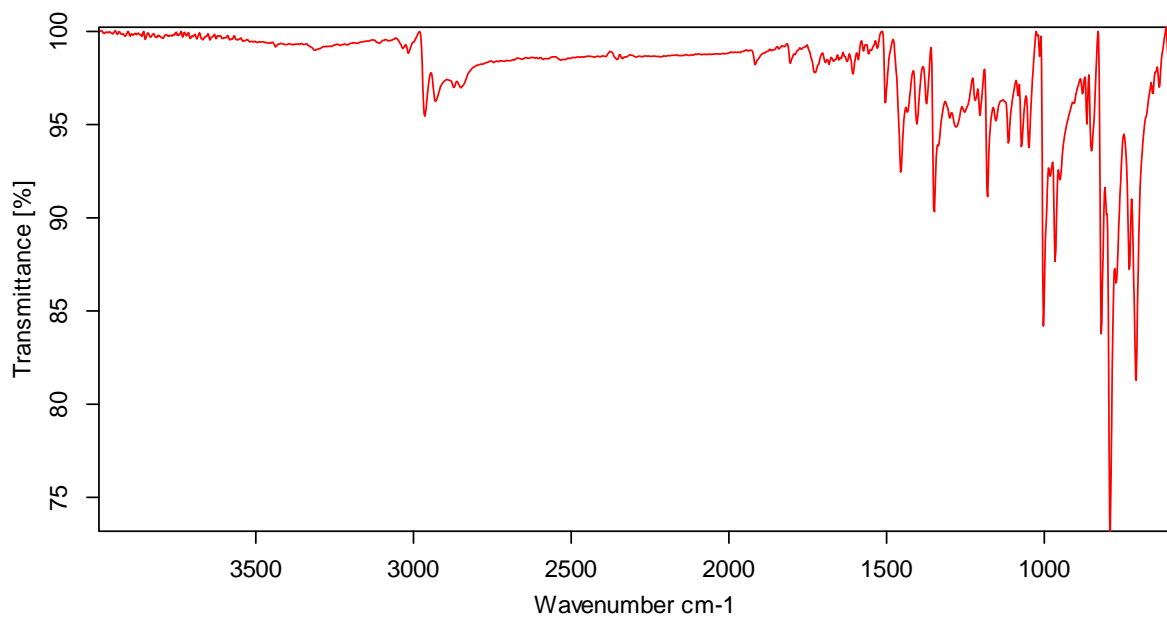

Figure S8. FTIR spectrum of (5, Ph-Ni).

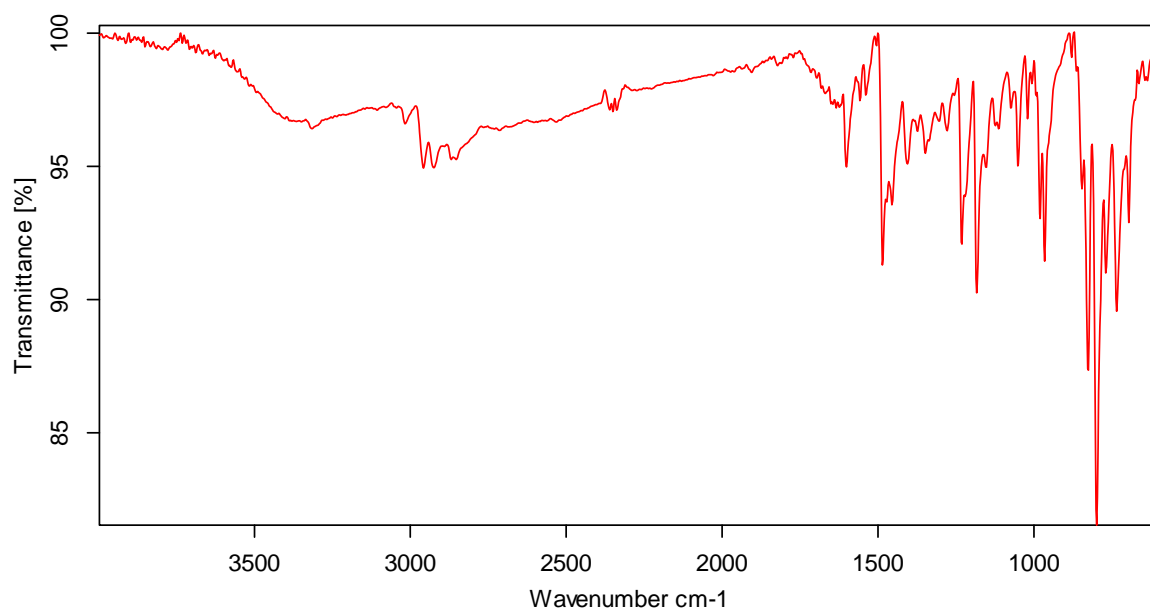

Figure S9. FTIR spectrum of (6, Ph-Al).

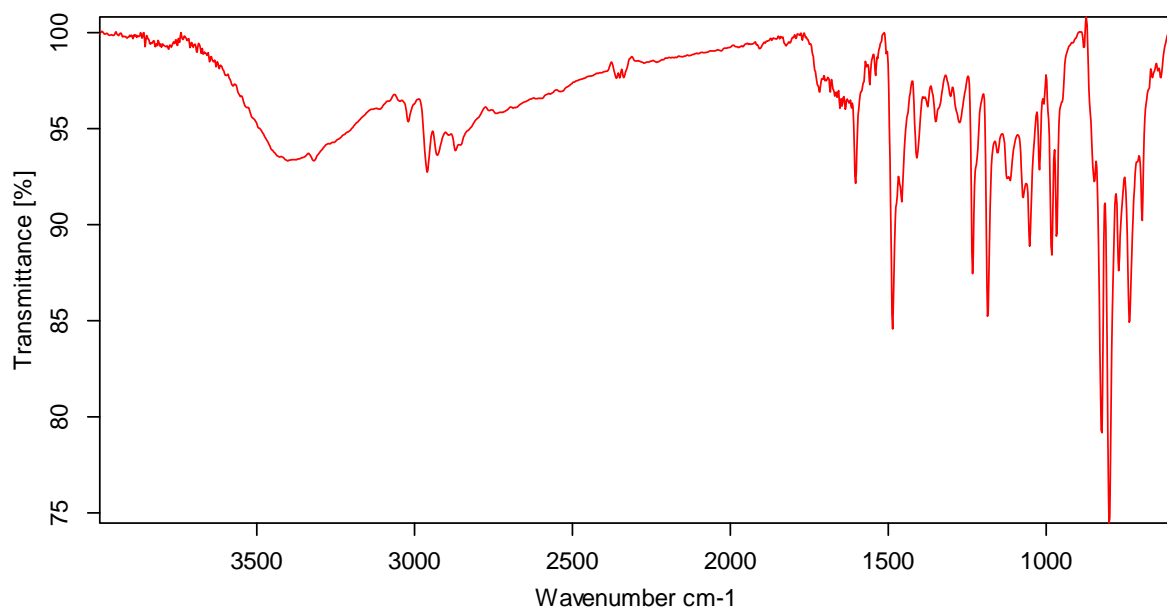

Figure S10. FTIR spectrum of (7, Ph-V).

*UV- Vis spectra*

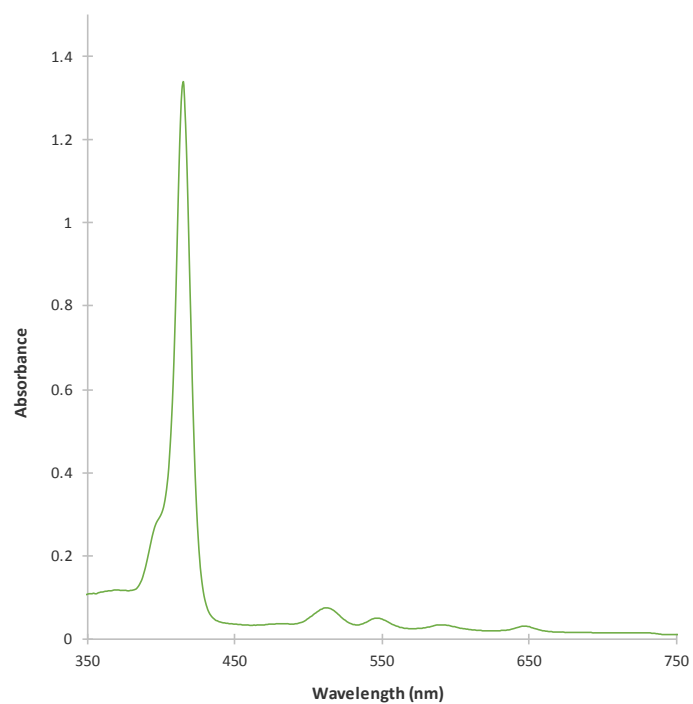

Figure S11. UV-Vis spectrum of (1, Ph) in ethyl acetate.

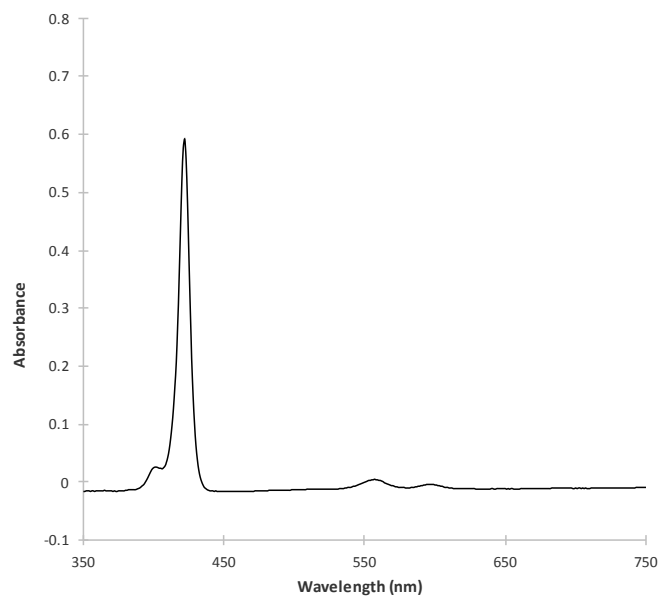

Figure S12. UV-Vis spectrum of (2, Ph-2) in ethyl acetate.

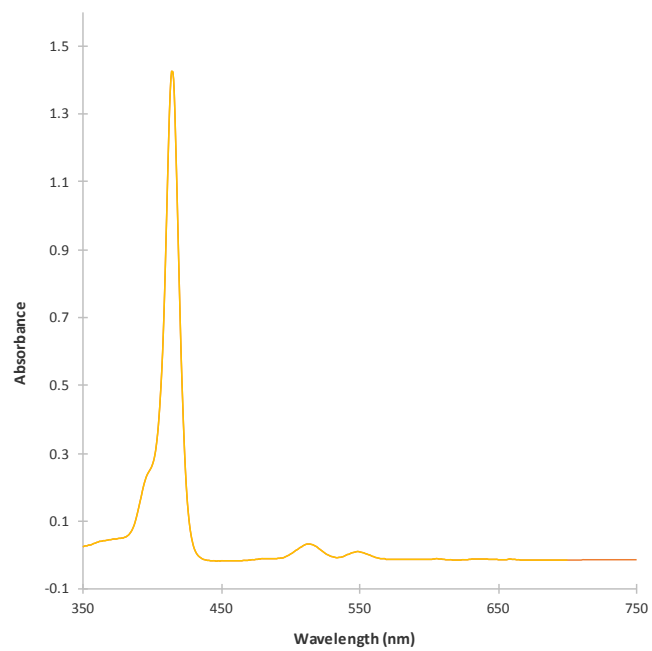

Figure S13. UV-Vis spectrum of (3, Ph-Sn) in ethyl acetate.

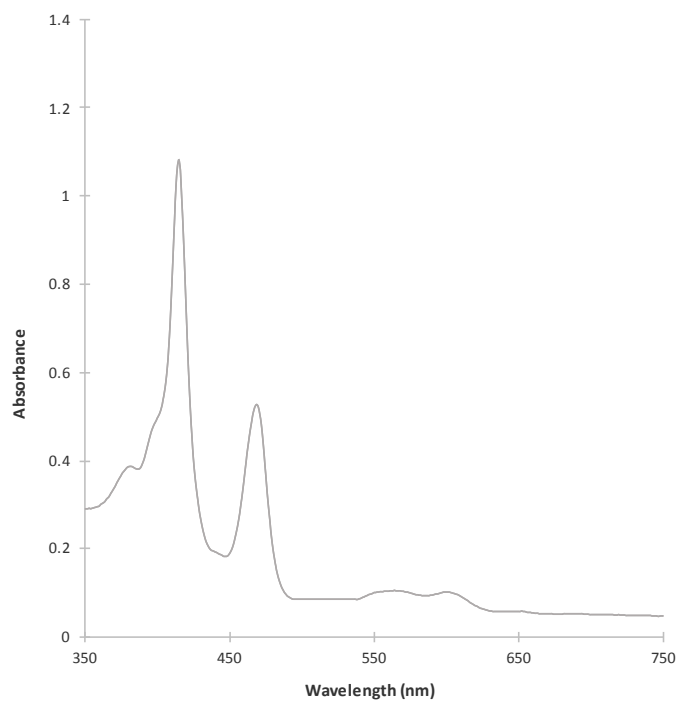

Figure S14. UV-Vis spectrum of (4, Ph-Mn) in ethyl acetate.

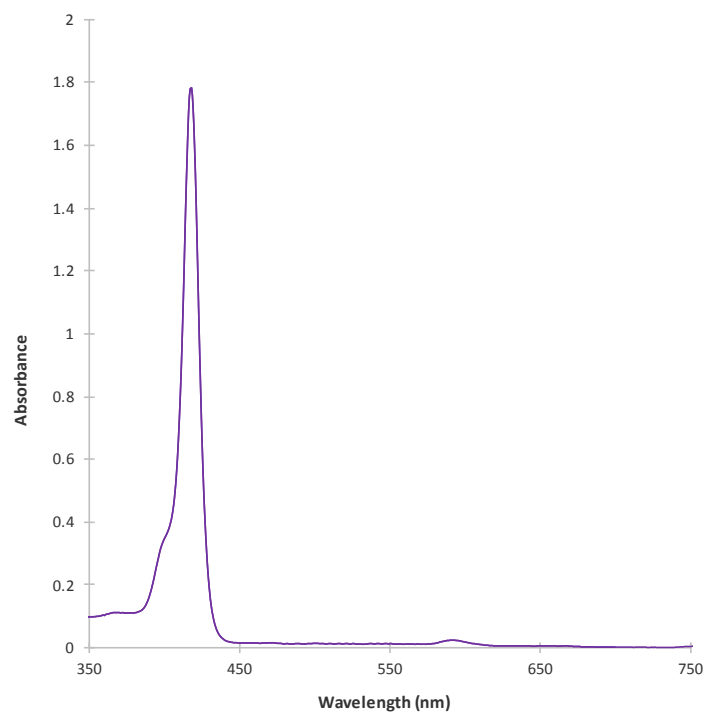

Figure S15. UV-Vis spectrum of (5, Ph-Ni) in ethyl acetate at room pH 7.0.

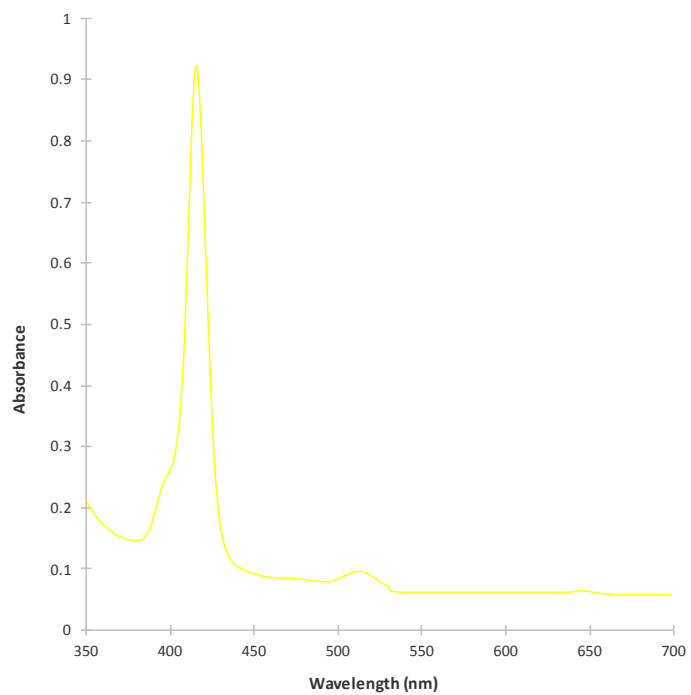

Figure S16. UV-Vis spectrum of (6, Ph-Al) in ethyl acetate.

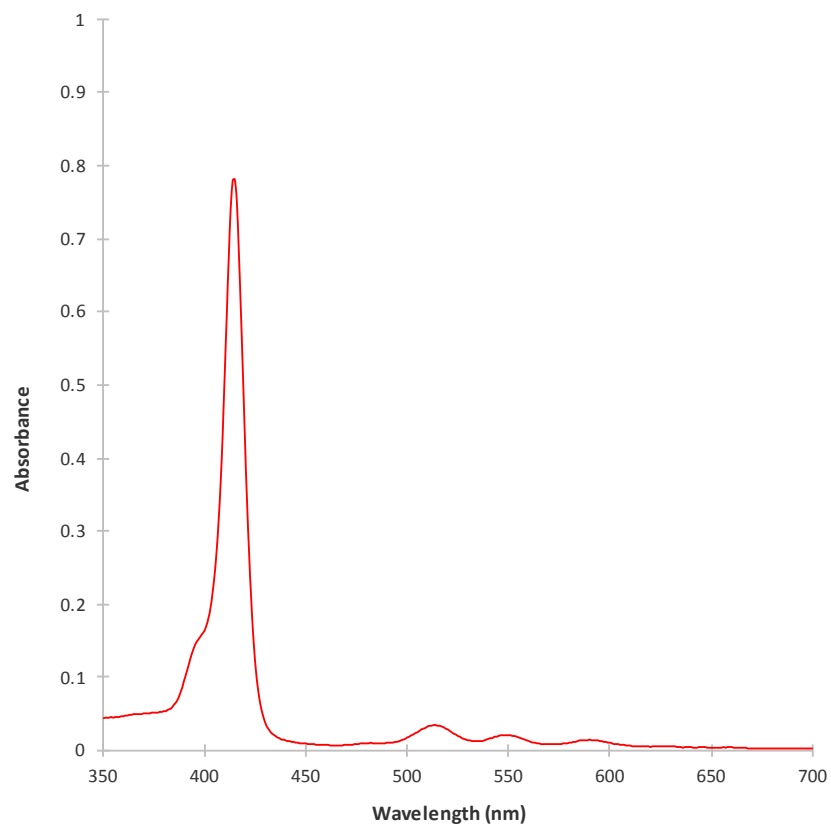

Figure S17. UV-Vis spectrum of (7, Ph-V) in ethyl acetate.

*Fluorescence spectra*

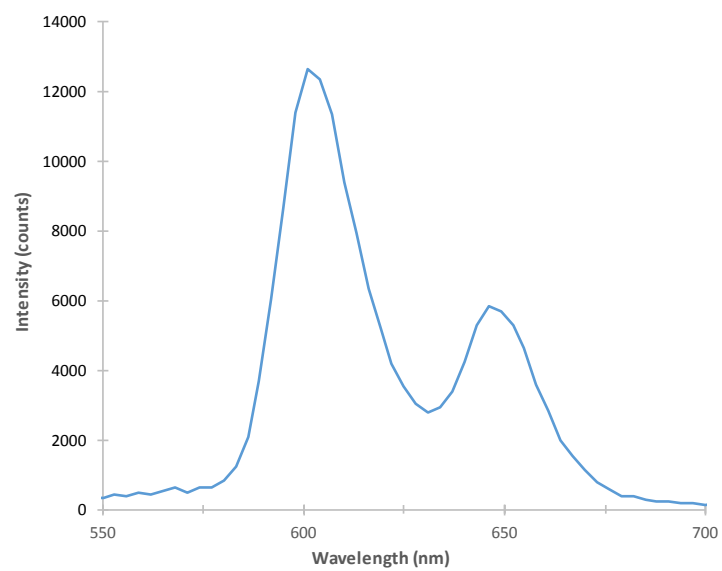

Figure S18. Emission spectrum of (1, Ph) in ethyl acetate.

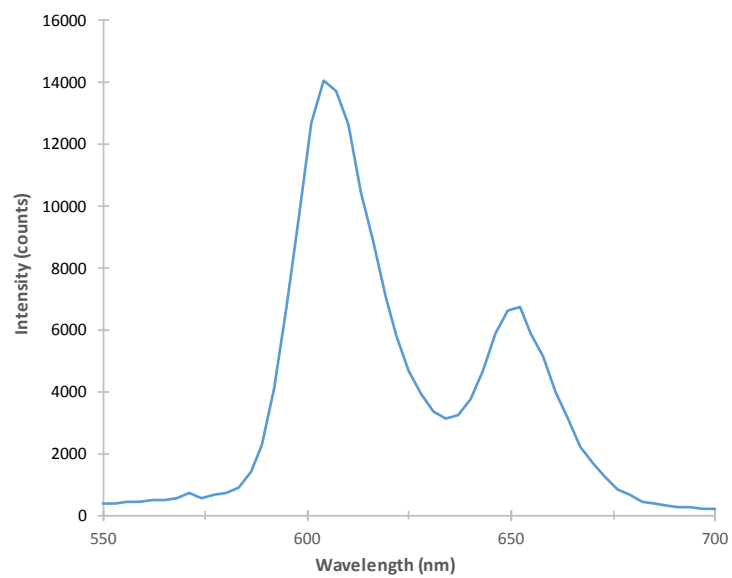

Figure S19. Emission spectrum of (2, Ph-Zn) in ethyl acetate.

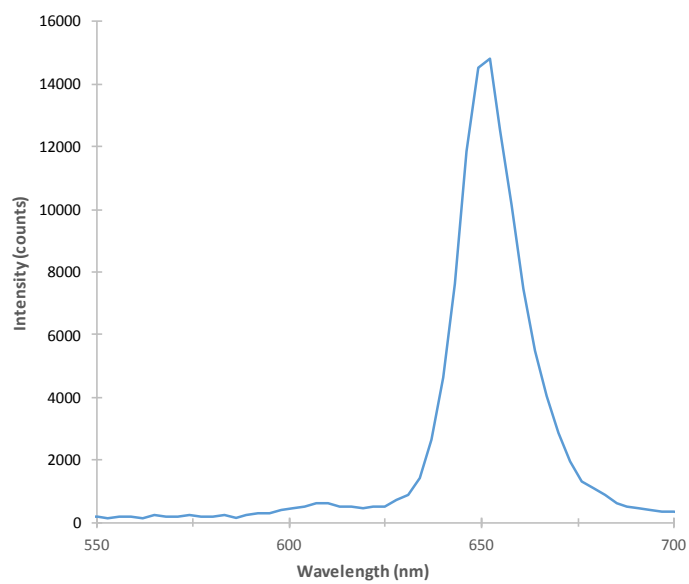

Figure S20. Emission spectrum of (3, Ph-Sn) in ethyl acetate.

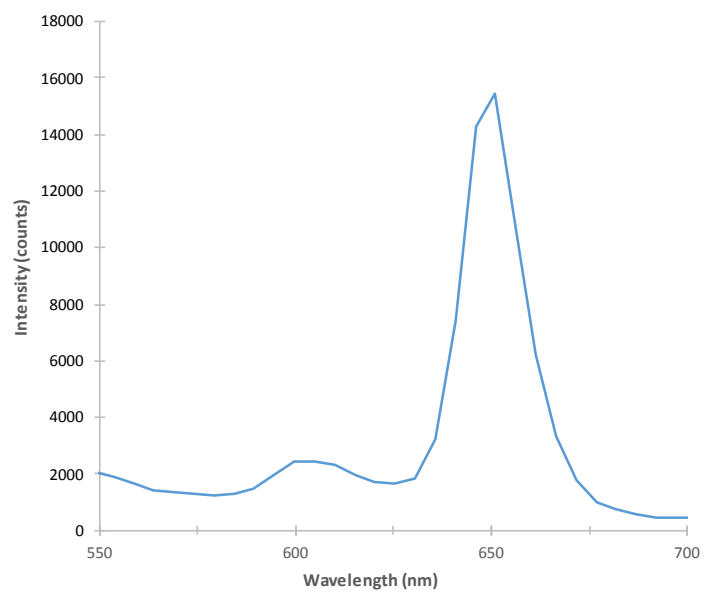

Figure S21. Emission spectrum of (4, Ph-Mn) in ethyl acetate.

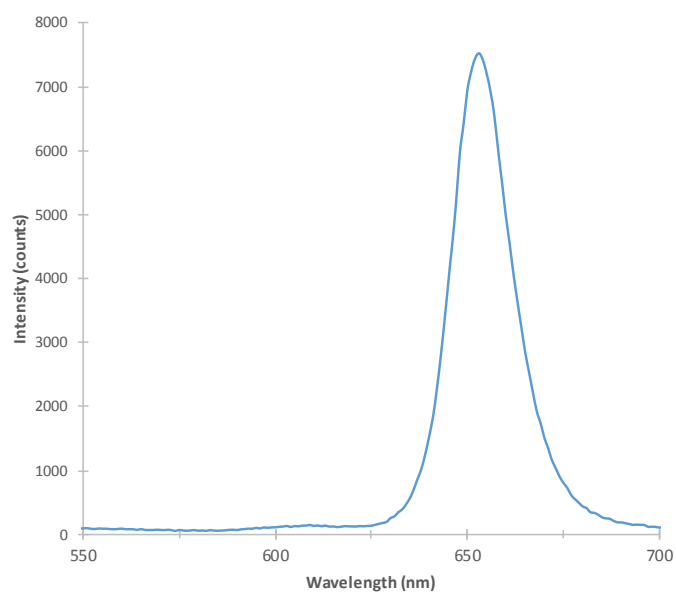

Figure S22. Emission spectrum of (5, Ph-Ni) in ethyl acetate.

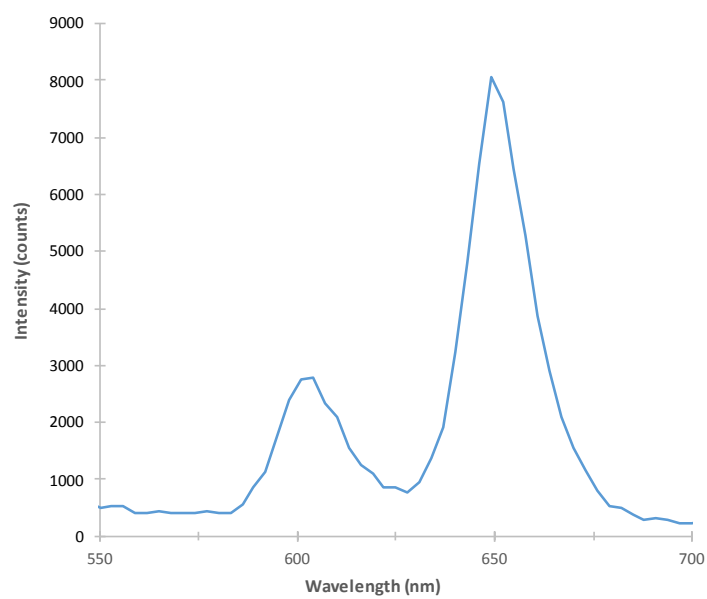

Figure S23. Emission spectrum of (6, Ph-Al) in ethyl acetate.

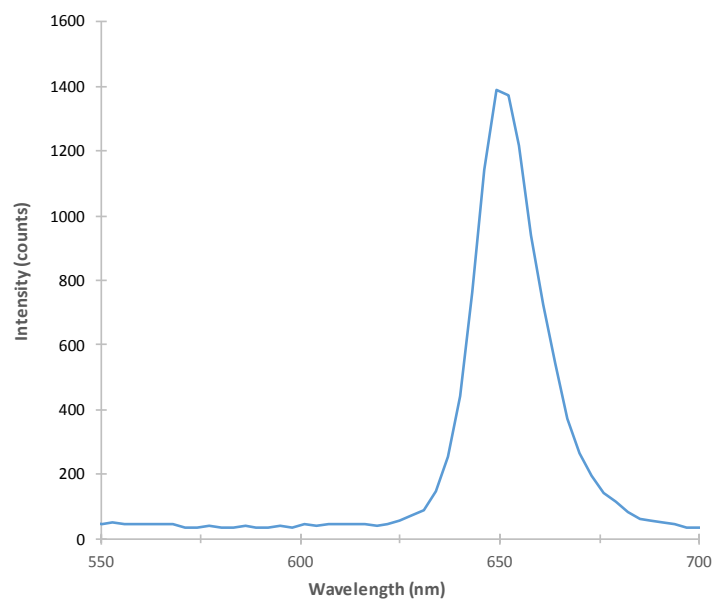

Figure S24. Emission spectrum of (7, Ph-V) in ethyl acetate.

*Singlet oxygen plots*

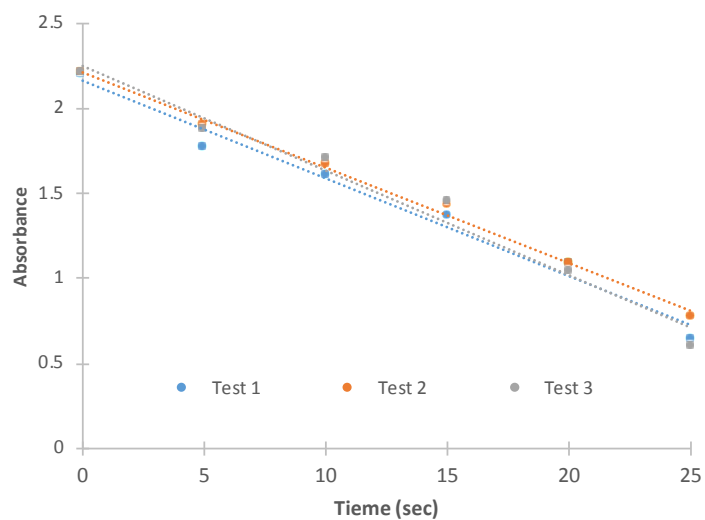

Figure S25. UV-Vis Absorbance of DPBF at 415 nm as a function of reaction time for (1, Ph), three tests are shown. Linear fitting is also shown.

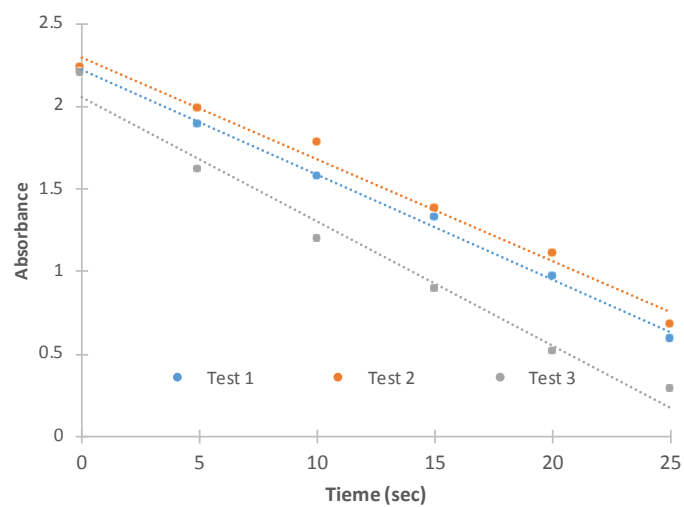

Figure S26. UV-Vis Absorbance of DPBF at 415 nm as a function of reaction time for (2, Ph-Zn), three tests are shown. Linear fitting is also shown.

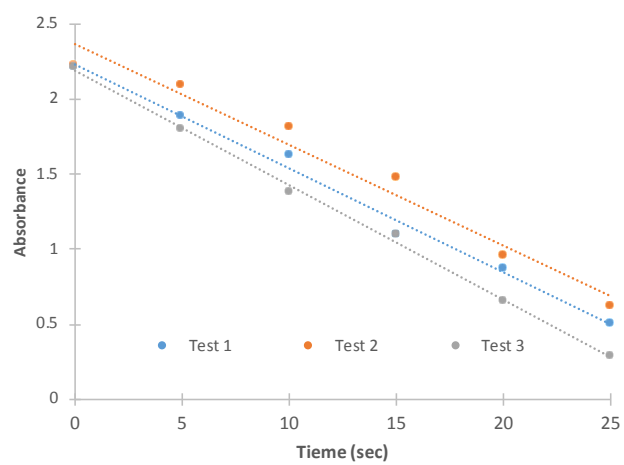

Figure S27. UV-Vis Absorbance of DPBF at 415 nm as a function of reaction time for (3, Ph-Sn), three tests are shown. Linear fitting is also shown.

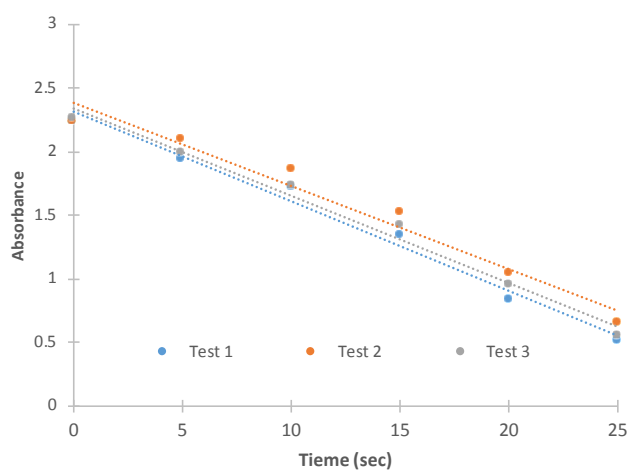

Figure S28. UV-Vis Absorbance of DPBF at 415 nm as a function of reaction time for (4, Ph-Mn), three tests are shown. Linear fitting is also shown.

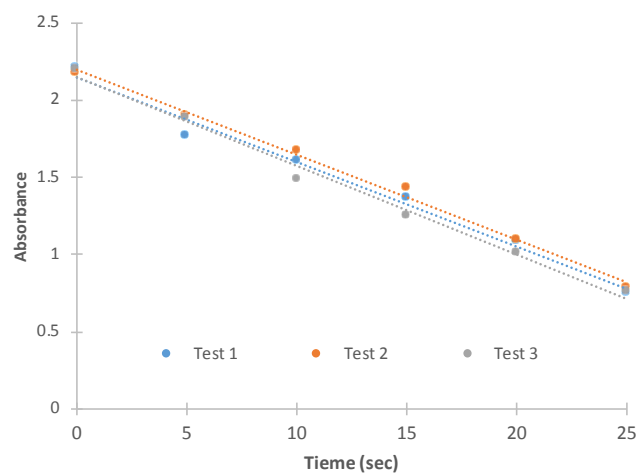

Figure S29. UV-Vis Absorbance of DPBF at 415 nm as a function of reaction time for (5, Ph-Ni), three tests are shown. Linear fitting is also shown.

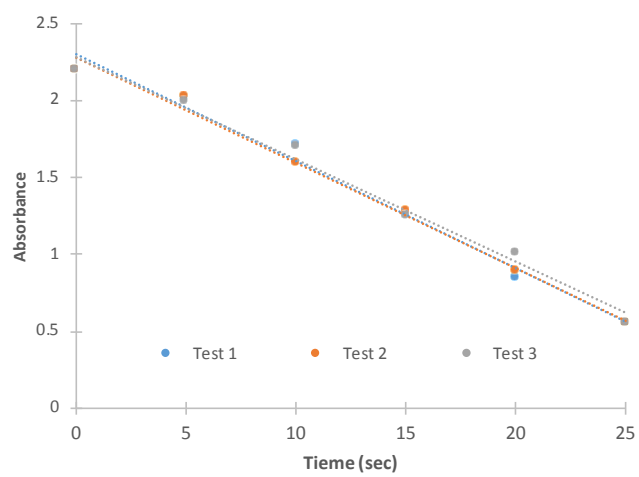

Figure S30. UV-Vis Absorbance of DPBF at 415 nm as a function of reaction time for (6, Ph-Al), three tests are shown. Linear fitting is also shown.

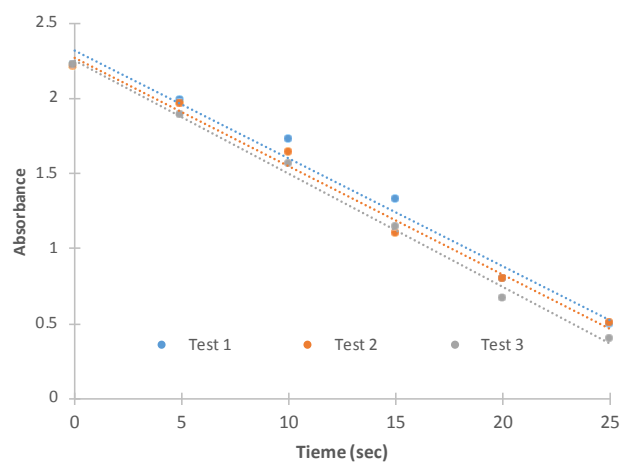

Figure S31. UV-Vis Absorbance of DPBF at 415 nm as a function of reaction time for (7, Ph-V), three tests are shown. Linear fitting is also shown.
